# Supplementary material for: Comparing Donor Site Morbidity for Autologous Breast Reconstruction: Thigh vs. Abdomen
Source: PubMed Central journal article supplement — Plast Reconstr Surg Glob Open. 2022 Mar 24;10(3):e4215. doi: 10.1097/GOX.0000000000004215 (PMC8947678; doi:10.1097/gox.0000000000004215), 2022-03-24
Supplement: gox-10-e4215-s001.pdf [file gox-10-e4215-s001.pdf]

**SDC 1: Patient-reported questionnaire for PAP or DIEP only patients**

**Which site was used for your breast reconstruction? (Choose one) THIGH or ABDOMEN**

**In the past 2 weeks with your thighs or abdomen in mind, how often have you experienced:**

|                                                             | <i>None of the time</i> | <i>A little of the time</i> | <i>Some of the time</i> | <i>Most of the time</i> | <i>All of the time</i> |
|-------------------------------------------------------------|-------------------------|-----------------------------|-------------------------|-------------------------|------------------------|
| Difficulty doing everyday activities (e.g. making your bed) | 1                       | 2                           | 3                       | 4                       | 5                      |
| Discomfort                                                  | 1                       | 2                           | 3                       | 4                       | 5                      |
| Tightness                                                   | 1                       | 2                           | 3                       | 4                       | 5                      |
| Negative impact on your sexual life due to incisions?       | 1                       | 2                           | 3                       | 4                       | 5                      |
| Negative impact on your ability to work?                    | 1                       | 2                           | 3                       | 4                       | 5                      |

**In the past 2 weeks, how satisfied or dissatisfied have you been with:**

|                                                                       | <i>Very dissatisfied</i> | <i>Somewhat dissatisfied</i> | <i>Somewhat satisfied</i> | <i>Very satisfied</i> |
|-----------------------------------------------------------------------|--------------------------|------------------------------|---------------------------|-----------------------|
| How your thighs or abdomen look in clothing?                          | 1                        | 2                            | 3                         | 4                     |
| How your thighs or abdomen looks without clothing?                    | 1                        | 2                            | 3                         | 4                     |
| How your thighs or abdomen scars look?                                | 1                        | 2                            | 3                         | 4                     |
| How your thighs or abdomen feels now compared to before your surgery? | 1                        | 2                            | 3                         | 4                     |
| How your thighs or abdomen looks now compared to before your surgery? | 1                        | 2                            | 3                         | 4                     |

**On a scale of 1-10 with 1 being not problematic at all and 10 being very problematic, how much of a problem were the thighs or abdomen? \_\_\_\_\_**

**What was the most problematic issue with your thighs or abdomen?**
