# Supplementary material for: Comparing Donor Site Morbidity for Autologous Breast Reconstruction: Thigh vs. Abdomen
Source: PubMed Central journal article supplement — Plast Reconstr Surg Glob Open. 2022 Mar 24;10(3):e4215. doi: 10.1097/GOX.0000000000004215 (PMC8947678; doi:10.1097/gox.0000000000004215), 2022-03-24
Supplement: gox-10-e4215-s002.pdf [file gox-10-e4215-s002.pdf]

**SDC 2: Patient-reported questionnaire for stacked PAP and DIEP patients**

**In the past 2 weeks with your donor site in mind,**

|                                                                  | <i>Choose one:</i> |
|------------------------------------------------------------------|--------------------|
| Which has caused more difficulty in doing everyday activities?   | Thigh OR Abdomen   |
| Which has caused more discomfort overall?                        | Thigh OR Abdomen   |
| Which has caused more tightness?                                 | Thigh OR Abdomen   |
| Which has had a greater negative impact on your sexual life?     | Thigh OR Abdomen   |
| Which has had a greater negative impact on your ability to work? | Thigh OR Abdomen   |

**In the past 2 weeks, how satisfied or dissatisfied have you been with:**

|                                                                                                                     | <i>Choose one:</i> |
|---------------------------------------------------------------------------------------------------------------------|--------------------|
| Which has caused more dissatisfaction in how you look in clothing?                                                  | Thigh OR Abdomen   |
| Which has caused more dissatisfaction in how you look without clothing?                                             | Thigh OR Abdomen   |
| Which donor site are you more dissatisfied with in terms of the appearance of the scar?                             | Thigh OR Abdomen   |
| Which donor site are you more dissatisfied with in terms of how the site feels now compared to before your surgery? | Thigh OR Abdomen   |
| Which donor site are you more dissatisfied with in terms of how the site looks now compared to before your surgery? | Thigh OR Abdomen   |
